# Supplementary material
Source: Springer Nature journal article supplement (https://www.springermedizin.de/resource/supplementary/12885_2011_2920_MOESM4_ESM.pdf/9462302)

# Test characteristics screen relevant neoplasia

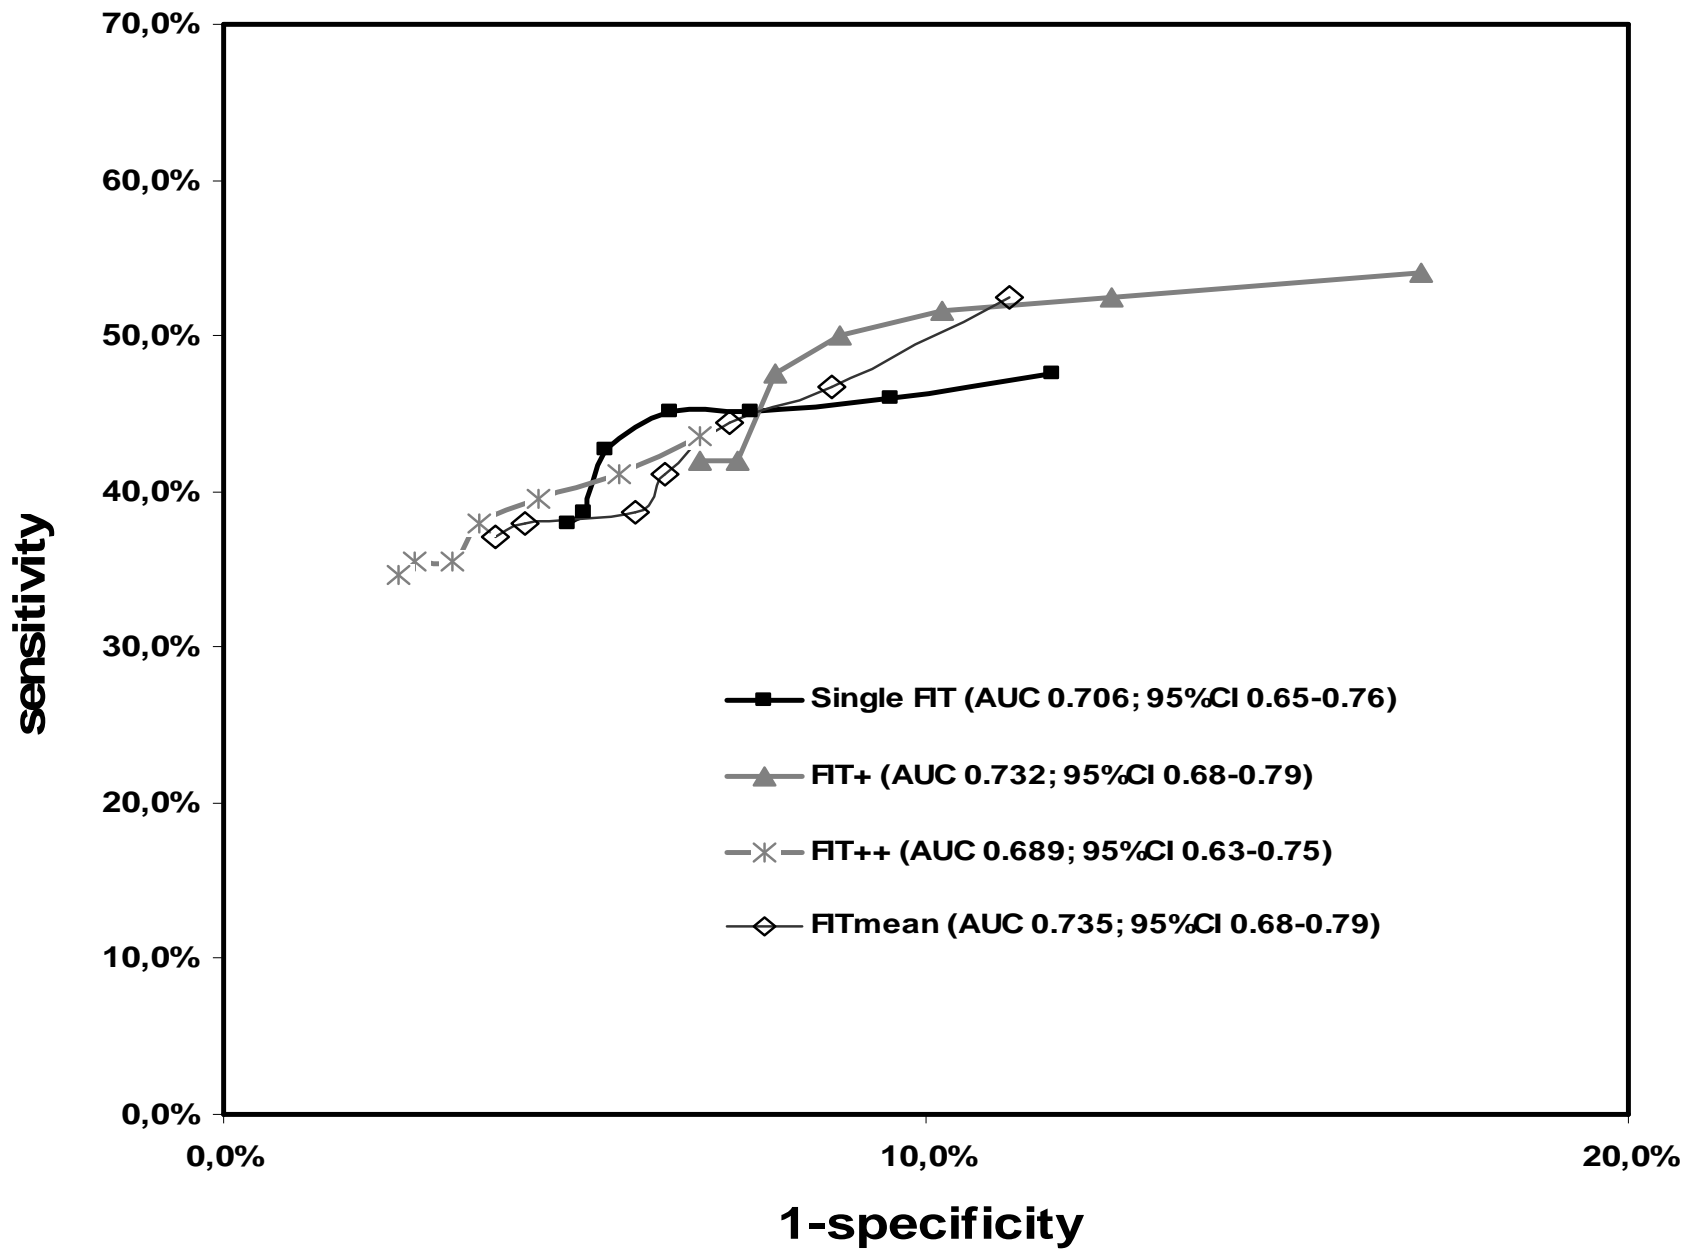

Supplement: MOESM4 [file 9462302]
